# Supplementary material
Source: PubMed Central journal article supplement (PMC5218588)
Supplement: NIHMS835505-supplement-supp_figure1.pdf [file NIHMS835505-supplement-supp_figure1.pdf]

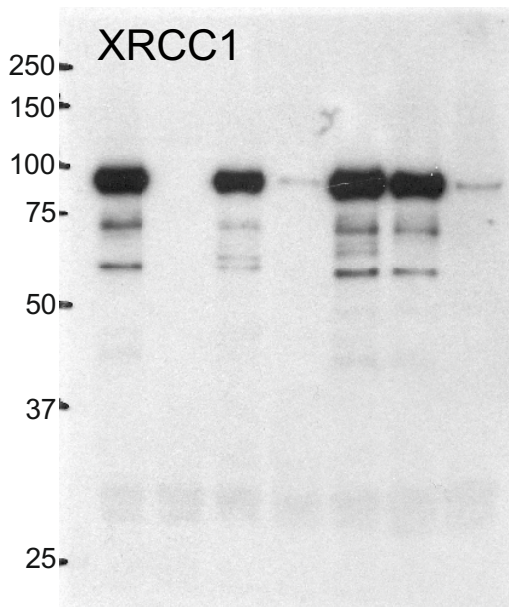

Uncropped blot used for Fig.2b

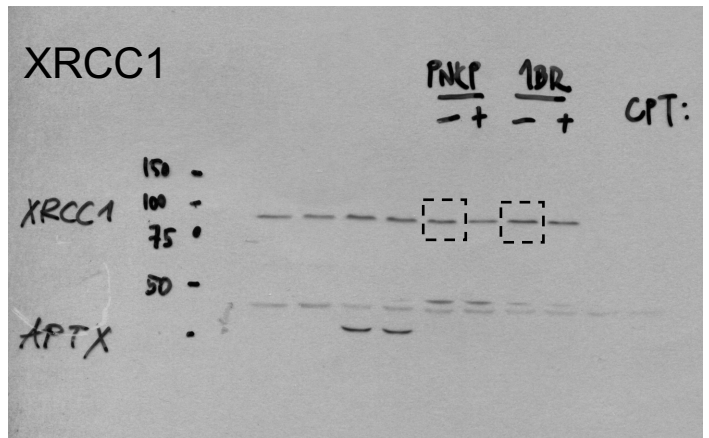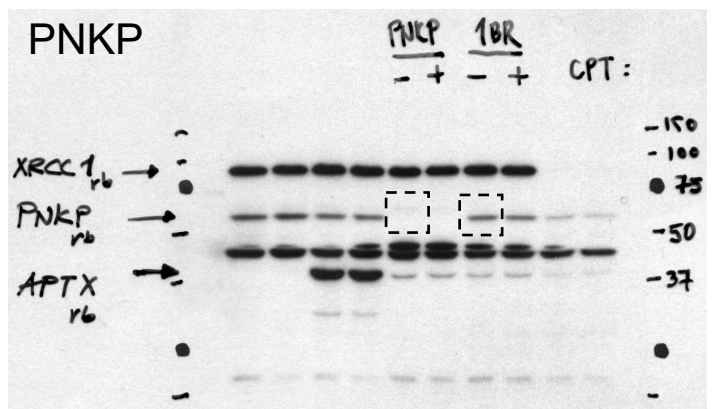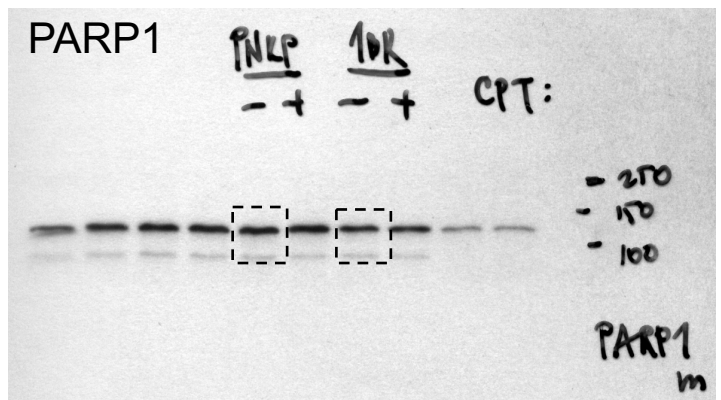

Uncropped blots used for Fig.4b (note lanes from samples not treated with CPT were used; dotted boxes )
